# Supplementary material for: Do Picardy Thirds Smile? Tonal Hierarchy and Tonal Valence
Source: Oxford University Press journal article supplement (doi:10.1525/mp.2022.39.5.443), 2022-05-26
Supplement: 2_maimon_etal_supplementary_materials_a.pdf [file 2_maimon_etal_supplementary_materials_a.pdf]

## Supplementary Materials A

### 1. Sample size simulations output plots

#### 1.1. Explicit

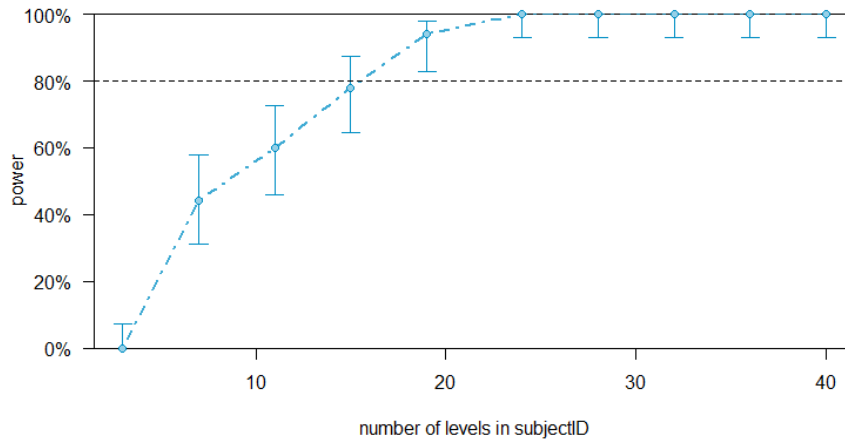

Figure S1: Sample size simulation output using simr-- a power analysis package for r, designed to interoperate with the lme4 package for LMMs (Bates et al., 2015) based on Maimon et al. (2020, Exp. 1A, brightness session).

#### 1.2. IAT: RTs

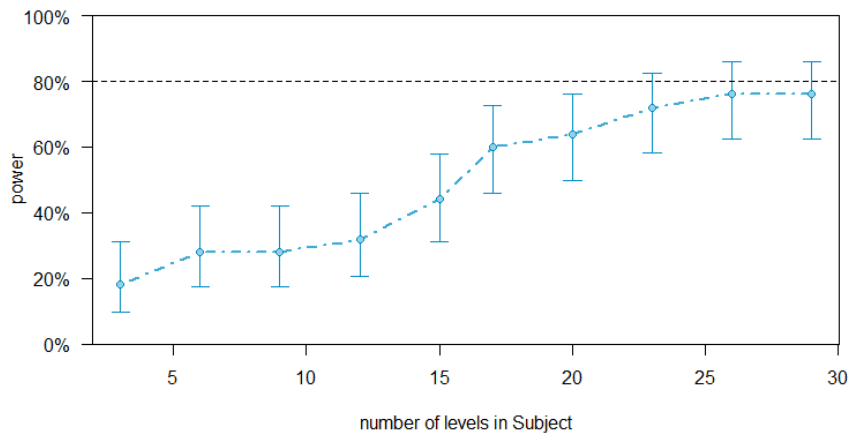

Figure S2: Sample size simulation output using simr-- a power analysis package for r, designed to interoperate with the lme4 package for LMMs (Bates et al., 2015), based on the data of Maimon et al. (2020, Exp. 2, brightness IAT).

### 1.3. IAT: accuracy rates

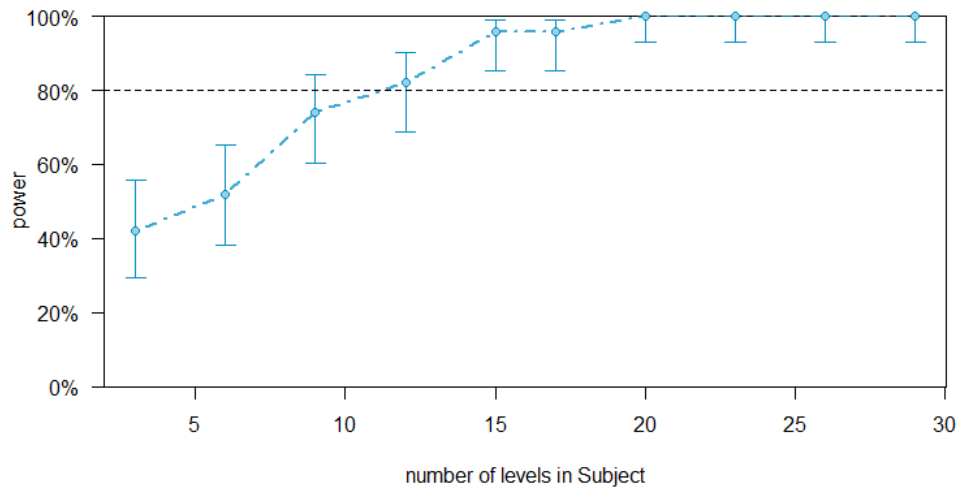

Figure S3: Sample size simulation output using simr-- a power analysis package for r, designed to interoperate with the lme4 package for LMMs (Bates et al., 2015) based on the data of Maimon et al. (2020, Exp. 2, brightness IAT).

## 2. Differences between element type, Experiment 2

| Key      | Probe    | RTs                | Accuracy rates  |
|----------|----------|--------------------|-----------------|
| C Major  | stable   | 581.89 $\pm$ 51.54 | 0.89 $\pm$ 0.11 |
|          | unstable | 586.16 $\pm$ 41.21 | 0.86 $\pm$ 0.16 |
| Db Major | stable   | 582.55 $\pm$ 46.7  | 0.88 $\pm$ 0.11 |
|          | unstable | 587.98 $\pm$ 45.32 | 0.895 $\pm$ 0.1 |

The differences between the mean reaction times and accuracy rates of the C major element and the Db major element were not significant ( $p= 0.56$  and  $p= 0.23$  for reaction times and accuracy rates respectively), the difference between the mean reaction times and accuracy rates of two types of probes (i.e., stable and unstable) were not significant ( $p= 0.206$  and  $p= 0.61$  for reaction times and accuracy rates respectively).
